# Supplementary material
Source: Springer Nature journal article supplement (https://www.springermedizin.de/resource/supplementary/12990_2010_298_MOESM6_ESM.pdf/9612978)

# Temperature Threshold vs Conduction Velocity

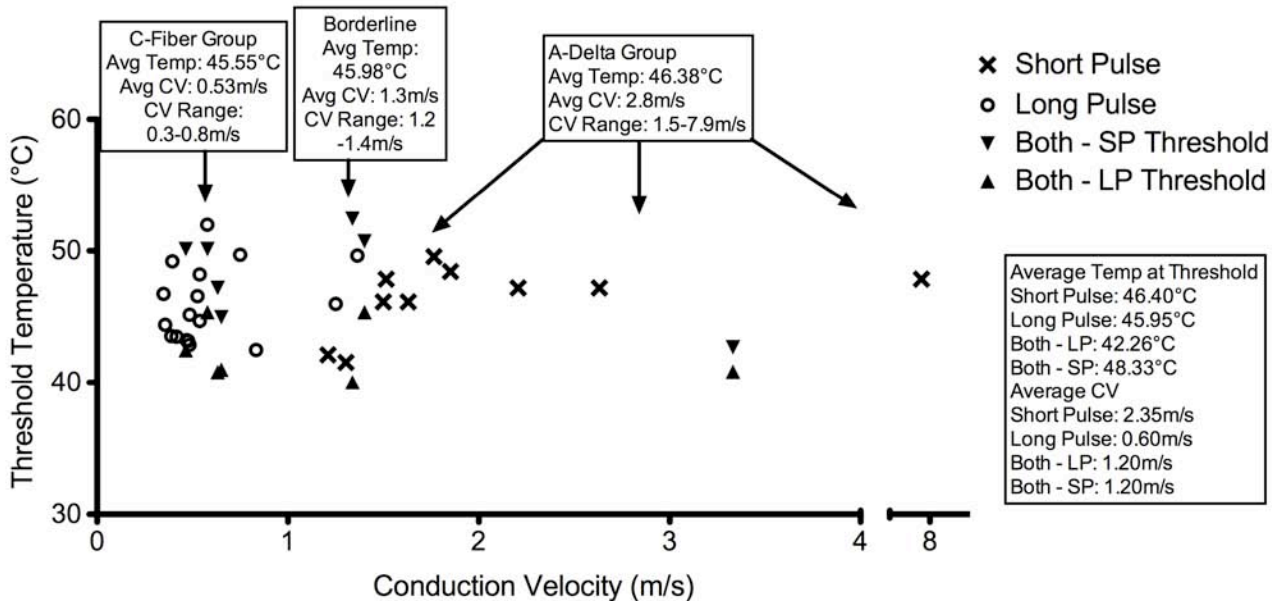

Supplement: MOESM6 [file 9612978]
